# Supplementary material for: Cost of Acute Malnutrition Treatment Using a Simplified or Standard Protocol in Diffa, Niger
Source: MDPI journal article supplement (doi:10.3390/nu15173833), 2023-09-01
Supplement: s1 [file s1]

**Supplementary Table S1.** Cost per child treated (detailed).

| Activity                                                               | Ingredients                                                          | Margin of Error and Justification                                                                                                                                                                        | Standard Protocol Area |           |             | Simplified Protocol Area |           |             |
|------------------------------------------------------------------------|----------------------------------------------------------------------|----------------------------------------------------------------------------------------------------------------------------------------------------------------------------------------------------------|------------------------|-----------|-------------|--------------------------|-----------|-------------|
|                                                                        |                                                                      |                                                                                                                                                                                                          | Lower Limit            | Base Case | Upper Limit | Lower Limit              | Base Case | Upper Limit |
| <b>1. Training</b>                                                     | Staff costs, room rental, per diem, transport and training materials | Treated as certain because these costs have been taken straight from the accountancy.                                                                                                                    | 2951.80                | 2951.80   | 2951.80     | 2951.80                  | 2951.80   | 2951.80     |
| <b>2. Coordination, support, supervision and institutional support</b> | 2.1. Personnel - AAH                                                 | Treated as uncertain, given that % of staff time spent on project activities is an estimate as is the allocation between arms. We assumed a 20% margin of error.                                         | 11124.30               | 13905.37  | 16686.45    | 16686.45                 | 20858.06  | 25029.67    |
|                                                                        | 2.2. Consultancies (Coverage)                                        | Treated as certain because price is fixed and as found in accountancy.                                                                                                                                   | 10809.97               | 10809.97  | 10809.97    | 10809.97                 | 10809.97  | 10809.97    |
|                                                                        | 2.2. Office costs - AAH                                              | Treated as uncertain. Uncertainty linked to the cost allocated to the project and to the uncertainty of allocation between arms. We assumed a 10% margin of error.                                       | 3612.21                | 4013.57   | 4414.92     | 5418.31                  | 6020.35   | 6622.38     |
|                                                                        | 2.3. Per diem and food costs -AAH                                    | Costs came from the accountancy data. But the allocation between study arms which was made at 40% to the control and 60% to the intervention area was uncertain. We assumed a 10% margin of error.       | 2515.26                | 2794.73   | 3074.20     | 3772.88                  | 4192.09   | 4611.30     |
|                                                                        | 2.4. Transport costs - AAH                                           | Costs were taken from the accountancy data. But the allocation between study arms which was made at 40% to the control and 60% to the intervention area was uncertain. We assumed a 10% margin of error. | 8748.97                | 9721.08   | 10693.19    | 13123.46                 | 14581.62  | 16039.78    |
|                                                                        | 2.5. DRSP staff costs                                                | Uncertainty stems from the % of time spent on nutrition activities as well as the allocation between study arms. We assumed a margin of error of 20%                                                     | 475.80                 | 594.76    | 713.71      | 713.71                   | 892.13    | 1070.56     |

|                            |                                                         |                                                                                                                                                                                                 |         |         |         |         |         |         |
|----------------------------|---------------------------------------------------------|-------------------------------------------------------------------------------------------------------------------------------------------------------------------------------------------------|---------|---------|---------|---------|---------|---------|
|                            | 2.6. Other DRSP supervision costs                       | Uncertainty stems from the % of time spent on nutrition activities as well as the allocation between study arms. We assume a margin of error of 20%                                             | 342.38  | 427.97  | 513.57  | 513.57  | 641.96  | 770.35  |
| <b>3. Case finding</b>     | 3.1. Mass screening                                     | Total cost was found in the accountancy data and is therefore fixed, however the allocation to study area (which was based on population size) is uncertain. We assume a margin of error of 10% | 2504.70 | 2783.00 | 3061.30 | 4651.59 | 5168.44 | 5685.28 |
|                            | 3.2. Community volunteers (time)                        | Uncertainty stems from the % of time spent on nutrition activities in these two areas as well as the allocation between study arms. We assume a margin of error of 20%.                         | 409.09  | 511.36  | 613.64  | 490.91  | 613.64  | 736.36  |
| <b>4. Health post site</b> | 4.1. Health post staff (time) on malnutrition treatment | Uncertainty stems from the amount of time spent on nutrition activities. We assumed a margin of error of 20%.                                                                                   | 944.06  | 1180.07 | 1416.08 | 755.24  | 944.06  | 1132.87 |
|                            | 4.2. CHW sites costs (rental and upkeep)                | Uncertainty stems from the fact that rental costs as well as upkeep costs and times spent on malnutrition activities were estimated. We assume an error margin of 20%                           | 455.83  | 569.79  | 683.75  | 1514.61 | 1893.27 | 2271.92 |
|                            | 4.3. CHW materials                                      | Fixed (from accountancy data)                                                                                                                                                                   | 570.88  | 570.88  | 570.88  | 570.88  | 570.88  | 570.88  |
|                            | 4.4.1. Cost of RUTF/RUSF a (MAM)                        | Numbers based on what was recorded for children with a full set of data. Assume margin of error of 10%                                                                                          | 798.34  | 887.04  | 975.74  | 1097.71 | 1219.68 | 1341.65 |
|                            | 4.4.2. Cost of RUTF SAM                                 | As above                                                                                                                                                                                        | 2043.36 | 2270.40 | 2497.44 | 3970.89 | 4412.10 | 4853.31 |
|                            | 4.4.3. Cost of drugs MAM                                | Numbers based on what was recorded for children with a full set of data. Assume margin of error of 10%                                                                                          | 1.01    | 1.12    | 1.23    | 17.94   | 19.93   | 21.93   |
|                            | 4.4.4. Cost of drugs SAM                                | As above                                                                                                                                                                                        | 67.50   | 75.00   | 82.50   | 115.72  | 128.58  | 141.44  |
| <b>5. Health centre</b>    | 5.1. Health centre staff (MAM and SAM)                  | Uncertainty stems from the amount of time spent on nutrition activities. We assumed a margin of error of 20%.                                                                                   | 1551.48 | 1939.35 | 2327.22 | 1103.73 | 1379.67 | 1655.60 |

|                                        |                                                                |                                                                                                                                                                        |               |               |               |              |               |               |
|----------------------------------------|----------------------------------------------------------------|------------------------------------------------------------------------------------------------------------------------------------------------------------------------|---------------|---------------|---------------|--------------|---------------|---------------|
|                                        | 5.3. Health centre rental and upkeep                           | Uncertainty stems from the fact that rental costs as well as upkeep costs and times spent on malnutrition activities were estimated. We assumed an error margin of 20% | 1208.39       | 1510.49       | 1812.59       | 4720.28      | 5900.35       | 7080.42       |
|                                        | 5.4. Health centre material and equipment                      | Fixed (from accountancy data)                                                                                                                                          | 855.53        | 855.53        | 855.53        | 855.53       | 855.53        | 855.53        |
|                                        | 5.5.1. RUTF/RUSF at health centre (MAM)                        | Numbers based on what was recorded for children with a full set of data. We assume margin of error of 10%.                                                             | 1140.48       | 1267.20       | 1393.92       | 3648.65      | 4054.05       | 4459.46       |
|                                        | 5.5.2. RUTF/RUSF at health centre (SAM)                        | As above                                                                                                                                                               | 2809.62       | 3121.80       | 3433.98       | 4022.87      | 4469.85       | 4916.84       |
|                                        | 5.5.3. Medicines at Health centre (MAM)                        | Numbers based on what was recorded for children with a full set of data. We assumed margin of error of 10%.                                                            | 27.39         | 27.39         | 35.60         | 53.01        | 53.01         | 68.91         |
|                                        | 5.5.4. Medicines at health centre (SAM)                        | Numbers based on what was recorded for children with a full set of data. We assumed margin of error of 10%.                                                            | 76.75         | 76.75         | 99.77         | 144.74       | 144.74        | 188.16        |
| <b>6. Logistics costs</b>              | 6.1. Supply transport from Niamey to district (UNICEF)         | We assumed a margin of error of 20% because the transport could have been with a different lorry (i.e. a bigger one that's cheaper)                                    | 518.07        | 647.58        | 777.10        | 1199.89      | 1499.86       | 1799.83       |
|                                        | 6.2. ACF transport costs for buffer stock                      | Fixed costs, but allocation uncertain. We assumed a 10% margin of error.                                                                                               | 150.93        | 167.70        | 184.47        | 352.17       | 391.30        | 430.43        |
|                                        | 6.2. Transport costs District -> Health facility-> Health post | Fixed costs, but allocation uncertain. We assumed 10% margin of error.                                                                                                 | 1322.96       | 1469.96       | 1616.95       | 2158.52      | 2398.35       | 2638.19       |
| <b>7. Referrals</b>                    |                                                                |                                                                                                                                                                        | 0.00          | 0.00          | 0.00          | 0.00         | 0.00          | 0.00          |
| <b>8. Societal costs</b>               |                                                                |                                                                                                                                                                        | 188.51        | 209.45        | 230.40        | 648.08       | 720.09        | 792.10        |
| Total costs, with uncertainty range    |                                                                |                                                                                                                                                                        | 58225.55      | 65361.11      | 72527.90      | 86083.11     | 97785.35      | 109546.91     |
| Total costs, with 95%CI *              |                                                                |                                                                                                                                                                        | 59822.85      | 65361.11      | 70927.10      | 88703.12     | 97785.35      | 106920.26     |
| Cost per child, with uncertainty range |                                                                |                                                                                                                                                                        | <b>164.02</b> | <b>184.12</b> | <b>204.30</b> | <b>96.83</b> | <b>109.99</b> | <b>123.22</b> |
| Cost per child, with 95%CI *           |                                                                |                                                                                                                                                                        | <b>168.51</b> | <b>184.12</b> | <b>199.79</b> | <b>99.77</b> | <b>109.99</b> | <b>120.27</b> |

\* Calculated using(<http://www.brixtonhealth.com/fuzzy.html>)

**Supplementary Table S2.** Treatment costs disaggregated by MAM and SAM.

| Activity                                                      | Ingredients                                                  | Kabléwa |        | N'Guigmi |       |
|---------------------------------------------------------------|--------------------------------------------------------------|---------|--------|----------|-------|
|                                                               |                                                              | MAM     | SAM    | MAM      | SAM   |
| Training, coordination, support, supervision and case finding |                                                              | 136.65  | 136.65 | 75.06    | 75.06 |
| Direct treatment costs                                        | Cost of health post and health centre staff time             | 4.89    | 9.62   | 2.10     | 4.60  |
|                                                               | Health post and health centre site costs (rental and upkeep) | 3.67    | 8.14   | 5.84     | 12.25 |
|                                                               | Treatment materials and equipment                            | 1.10    | 2.10   | 0.50     | 0.80  |
|                                                               | RUTF costs                                                   | 0.00    | 31.41  | 10.92    | 21.88 |
|                                                               | RUSF costs                                                   | 17.84   | 0.00   | 0.00     | 0.00  |
|                                                               | Medicine costs                                               | 0.09    | 0.92   | 0.13     | 0.67  |
|                                                               | RUTF/RUSF transport costs                                    | 0.65    | 2.73   | 1.16     | 2.31  |
| Direct treatment cost total                                   |                                                              | 28.24   | 54.92  | 20.65    | 42.5  |
| Societal costs                                                |                                                              | 0.62    | 0.85   | 0.81     | 0.95  |
| Total Cost per child treated                                  |                                                              | 165.5   | 192.4  | 96.5     | 118.5 |
